# Supplementary material for: Measurement-based care educational programmes for clinical trainees in mental healthcare: a scoping review protocol
Source: HighWire-hosted journal article supplement (doi:10.1136/bmjopen-2021-054751), 2021-10-01
Supplement: bmjopen-2021-054751supp001_data_supplement.pdf [file bmjopen-2021-054751supp001_data_supplement.pdf]

**Appendix A.** Preferred Reporting Items for Systematic reviews and Meta-Analyses extension for Scoping Reviews (PRISMA-ScR) Checklist

| Section                                              | Reported on Page #                  |
|------------------------------------------------------|-------------------------------------|
| Title                                                | 1                                   |
| Structured summary                                   | 2                                   |
| Rationale                                            | 3-7                                 |
| Objectives                                           | 7-8                                 |
| Protocol and registration                            | Article. Registration not available |
| Eligibility criteria                                 | 8-9                                 |
| Information sources                                  | 8-9                                 |
| Search                                               | Appendix B                          |
| Selection of sources of evidence                     | 9                                   |
| Data charting process                                | 10                                  |
| Data items                                           | 10                                  |
| Critical appraisal of individual sources of evidence | Not applicable                      |
| Synthesis of results                                 | 10                                  |
| Selection of sources of evidence                     | Not applicable given protocol       |
| Characteristics of sources of evidence               | Not applicable given protocol       |
| Critical appraisal within sources of evidence        | Not applicable given protocol       |
| Results of individual sources of evidence            | Not applicable given protocol       |
| Synthesis of results                                 | Not applicable given protocol       |
| Summary of evidence                                  | Not applicable given protocol       |
| Limitations                                          | 11                                  |
| Conclusions                                          | 11-12                               |
| Funding                                              | 12                                  |

*From:* Tricco AC, Lillie E, Zarin W, et al. PRISMA Extension for Scoping Reviews (PRISMA-ScR): Checklist and Explanation. *Ann Intern Med* 2018;169(7):467-73. doi:10.7326/m18-0850
